# Supplementary material for: Sagittal spinal morphotype assessment in 8 to 15 years old Inline Hockey players
Source: PeerJ. 2020 Jan 2;8:e8229. doi: 10.7717/peerj.8229 (PMC6942677; doi:10.7717/peerj.8229)
Supplement: Supplemental Information 1 [file peerj-08-8229-s001.xlsx]

## Sheet: SPSS ROM raquis
N	Sport	Gender	Age	Weight	Height	BMI	Category	Competition level	Player position	Dominant arm	Dominant leg	Dorsal angle in SP	Dorsal classification in SP	Lumbar angle in SP	Lumbar classification in SP	Dorsal angle in SSP	Dorsal classification in SSP	Lumbar angle in SSP	Lumbar classification in SSP	Sagittal thoracic morphotype	thoracic codification	Sagittal lumbar morphotype	lumbar codification	Lumbo-horizontal angle	lumbo-horizontal angle classification
1	Inline hockey	1	9	35	1.419	17.3821	1	6	4	1	2	34	2	26	2	20	2	36	3	NORMAL	3	Total functional hyperkyphosis	7	120	3
2	Inline hockey	1	8	27	1.302	15.9273	1	6	2	1	2	36	2	18	1	44	3	40	3	Static functional hyperkyphosis	5	Structure lumbar kyphosis	1	130	3
3	Inline hockey	1	10	37	1.378	19.4851	2	6	1	2	1	44	3	30	2	52	3	22	3	Static hyperkyphosis	8	Total functional hyperkyphosis	7	122	3
4	Inline hockey	1	12	42	1.494	18.8169	2	6	4	1	1	40	2	30	2	44	3	26	3	Total functional hyperkyphosis	7	Total functional hyperkyphosis	7	102	1
5	Inline hockey	1	11	65	1.584	25.9062	2	6	4	1	1	42	3	26	2	40	2	6	2	dynamic hyperkyphosis	9	NORMAL	4	110	2
6	Inline hockey	1	10	43	1.436	20.8526	2	6	4	1	1	32	2	40	2	38	2	16	3	NORMAL	3	Static functional hyperkyphosis	5	100	1
7	Inline hockey	1	11	49.2	1.467	22.8615	2	6	4	1	1	42	3	42	3	40	2	22	3	dynamic hyperkyphosis	9	lumbar hypermobility	10	120	3
8	Inline hockey	1	10	53.9	1.516	23.4526	2	6	4	1	2	44	3	30	2	48	3	14	2	Static hyperkyphosis	8	dynamic functional hyperkyphosis	6	120	3
9	Inline hockey	1	10	36.9	1.481	16.8235	2	6	1	1	1	40	2	20	2	60	3	30	3	Total functional hyperkyphosis	7	Total functional hyperkyphosis	7	122	3
10	Inline hockey	2	12	37.2	1.49	16.756	2	6	4	1	1	42	3	32	2	36	2	32	3	standing hyperkyphosis	4	Total functional hyperkyphosis	7	104	1
11	Inline hockey	2	11	49	1.479	22.4006	2	6	1	1	1	42	3	36	2	42	3	25	3	total hyperkyphosis	10	Total functional hyperkyphosis	7	122	3
12	Inline hockey	2	11	40.9	1.436	19.8342	2	6	4	1	1	42	3	20	2	26	2	42	3	standing hyperkyphosis	4	Total functional hyperkyphosis	7	116	2
13	Inline hockey	2	11	33.4	1.453	15.8203	2	6	4	2	1	28	2	22	2	42	3	22	3	Total functional hyperkyphosis	7	Static functional hyperkyphosis	5	120	3
14	Inline hockey	1	11	57.9	1.485	26.2558	2	6	4	1	1	36	2	36	2	46	3	10	2	Total functional hyperkyphosis	7	NORMAL	4	102	1
15	Inline hockey	1	10	44.2	1.422	21.8586	2	4	4	1	1	35	2	33	2	48	3	26	3	Static functional hyperkyphosis	5	Total functional hyperkyphosis	7	116	2
16	Inline hockey	1	10	37.6	1.416	18.7526	2	6	3	1	1	36	2	34	2	48	3	28	3	Static functional hyperkyphosis	5	Total functional hyperkyphosis	7	120	3
17	Inline hockey	1	10	27.7	1.357	15.0425	2	6	4	1	1	52	3	24	2	52	3	30	3	total hyperkyphosis	10	Static functional hyperkyphosis	5	126	3
18	Inline hockey	1	11	36.9	1.493	16.5541	2	6	1	1	1	45	3	38	2	49	3	26	3	total hyperkyphosis	10	Total functional hyperkyphosis	7	112	2
19	Inline hockey	1	11	59.1	1.508	25.9887	2	6	1	1	1	40	2	33	2	50	3	8	2	Total functional hyperkyphosis	7	NORMAL	4	118	3
20	Inline hockey	2	10	50.4	1.452	23.9055	2	6	2	1	1	40	2	38	2	52	3	2	2	Static functional hyperkyphosis	5	NORMAL	4	98	1
21	Inline hockey	2	10	48.4	1.456	22.8309	2	6	3	1	1	40	2	34	2	32	2	18	3	NORMAL	3	Static functional hyperkyphosis	5	106	1
22	Inline hockey	2	10	31.6	1.44	15.2392	2	6	4	1	1	22	2	30	2	34	2	26	3	NORMAL	3	Total functional hyperkyphosis	7	130	3
23	Inline hockey	2	10	33.7	1.46	15.8097	2	6	2	1	1	46	3	22	2	42	3	26	3	Static hyperkyphosis	8	Static functional hyperkyphosis	5	122	3
24	Inline hockey	1	12	71.2	1.625	26.9633	2	4	2	1	1	40	2	34	2	40	2	1	2	dynamic functional hyperkyphosis	6	NORMAL	4	110	2
25	Inline hockey	1	12	41.2	1.455	19.4613	2	4	3	1	1	36	2	30	2	40	2	22	3	NORMAL	3	Total functional hyperkyphosis	7	100	1
26	Inline hockey	1	11	43	1.502	19.0602	2	6	1	1	1	32	2	26	2	44	3	24	3	Static functional hyperkyphosis	5	Total functional hyperkyphosis	7	108	1
27	Inline hockey	1	12	47	1.52	20.3428	2	4	3	2	1	40	2	32	2	48	3	4	2	Static functional hyperkyphosis	5	NORMAL	4	108	1
28	Inline hockey	1	12	58.2	1.562	23.854	2	6	2	1	1	36	2	18	1	54	3	8	2	Total functional hyperkyphosis	7	hypolordotic attitude	3	114	2
29	Inline hockey	1	12	47.1	1.535	19.9896	2	6	4	1	1	26	2	30	2	36	2	20	3	dynamic functional hyperkyphosis	6	Total functional hyperkyphosis	7	116	2
30	Inline hockey	1	12	43.6	1.456	20.5667	2		4	2	2	40	2	38	2	40	2	22	3	NORMAL	3	Total functional hyperkyphosis	7	88	1
31	Inline hockey	1	12	58.9	1.568	23.9565	2	6	2	1	1	38	2	25	2	44	3	10	2	Static functional hyperkyphosis	5	NORMAL	4		1
32	Inline hockey	1	12	42.2	1.564	17.252	2	6	3	1	1	38	2	18	1	52	3	36	3	Total functional hyperkyphosis	7	Structure lumbar kyphosis	1	122	3
33	Inline hockey	1	12	39	1.515	16.9918	2	4	3	1	1	50	3	38	2	56	3	36	3	total hyperkyphosis	10	Total functional hyperkyphosis	7	116	2
34	Inline hockey	1	10	36	1.38	18.9036	2	6	2	1	1	46	3	24	2	45	3	18	3	Static hyperkyphosis	8	Static functional hyperkyphosis	5	110	2
35	Inline hockey	1	12	45.9	1.53	19.6078	2	6	2	2	2	40	2	30	2	42	3	34	3	Static functional hyperkyphosis	5	Total functional hyperkyphosis	7	110	2
36	Inline hockey	2	12	42.7	1.46	20.0319	2	6	3	1	1	20	2	24	2	40	2	26	3	hypomobile kyphosis	2	Total functional hyperkyphosis	7	88	1
37	Inline hockey	2	11	45.7	1.49	20.5847	2	6	1	1	1	26	2	20	2	30	2	20	3	NORMAL	3	Total functional hyperkyphosis	7	96	1
38	Inline hockey	1	11	57.3	1.597	22.467	2	6	3	2	1	46	3	40	2	50	3	8	2	total hyperkyphosis	10	NORMAL	4	108	1
39	Inline hockey	2	10	57.4	1.43	28.0698	2	6	1	1	1	50	3	30	2	38	2	10	2	standing hyperkyphosis	4	NORMAL	4	100	1
40	Inline hockey	1	11	40.2	1.535	17.0612	2	6	1	2	2	32	2	14	1	56	3	22	3	Total functional hyperkyphosis	7	Structure lumbar kyphosis	1	113	2
41	Inline hockey	1	10	43	1.44	20.7369	2	6	3	1	1	36	2	26	2	52	3	18	3	Static functional hyperkyphosis	5	Total functional hyperkyphosis	7	104	1
42	Inline hockey	1	11	44.6	1.469	20.6677	2	6	3	1	1	36	2	40	2	30	2	0	2	NORMAL	3	dynamic functional hyperkyphosis	6	114	2
43	Inline hockey	1	11	58.5	1.443	28.0946	2	6	3	1	1	46	3	38	2	60	3	10	2	Static hyperkyphosis	8	dynamic functional hyperkyphosis	6	119	3
44	Inline hockey	1	13	69.1	1.647	25.4736	3	6	2	1	2	32	2	22	2	42	3	6	2	Static functional hyperkyphosis	5	NORMAL	4	106	1
45	Inline hockey	1	13	46.1	1.45	21.9263	3	4	2	1	1	38	2	28	2	44	3	18	3	Static functional hyperkyphosis	5	Total functional hyperkyphosis	7	100	1
46	Inline hockey	1	14	53.2	1.674	18.9846	3	5	2	1	1	44	3	30	2	58	3	20	3	total hyperkyphosis	10	Static functional hyperkyphosis	5	108	1
47	Inline hockey	1	14	63.45	1.736	21.0539	3	5	3	1	1	46	3	33	2	62	3	9	2	total hyperkyphosis	10	NORMAL	4	107	1
48	Inline hockey	1	13	50.6	1.7	17.5087	3	4	1	1	1	36	2	34	2	60	3	36	3	Total functional hyperkyphosis	7	Total functional hyperkyphosis	7	127	3
49	Inline hockey	2	13	49.9	1.607	19.3227	3	6	3	1	1	32	2	28	2	36	2	21	3	NORMAL	3	Static functional hyperkyphosis	5	90	1
50	Inline hockey	1	12	49	1.64	18.2183	3	6	1	1	1	38	2	20	2	60	3	30	3	Total functional hyperkyphosis	7	Total functional hyperkyphosis	7	106	1
51	Inline hockey	1	14	57.8	1.67	20.725	3	4	3	1	1	36	2	24	2	38	2	20	3	dynamic functional hyperkyphosis	6	Static functional hyperkyphosis	5	122	3
52	Inline hockey	1	14	62	1.654	22.6632	3	6	2	1	1	46	3	26	2	58	3	22	3	total hyperkyphosis	10	Static functional hyperkyphosis	5	116	2
53	Inline hockey	1	13	59	1.635	22.0707	3	4	4	1	1	32	2	38	2	50	3	9	2	Static functional hyperkyphosis	5	NORMAL	4	102	1
54	Inline hockey	1	13	71.9	1.661	26.0609	3	4	2	1	1	46	3	36	2	60	3	18	3	total hyperkyphosis	10	Static functional hyperkyphosis	5	116	2
55	Inline hockey	1	12	50.4	1.54	21.2515	3	6	3	1	1	42	3	28	2	46	3	24	3	Static hyperkyphosis	8	Total functional hyperkyphosis	7	102	1
56	Inline hockey	1	14	51.75	1.59	20.4699	3	6	3	1	2	34	2	20	2	38	2	36	3	NORMAL	3	Total functional hyperkyphosis	7	104	1
57	Inline hockey	1	12	52.5	1.51	23.0253	3	6	2	1	1	54	3	30	2	50	3	16	3	total hyperkyphosis	10	Static functional hyperkyphosis	5	118	3
58	Inline hockey	1	14	57.1	1.48	26.0683	3	6	1	1	1	36	2	30	2	43	3	10	2	Static functional hyperkyphosis	5	NORMAL	4	105	1
59	Inline hockey	1	14	59.9	1.65	22.0018	3	6	3	1	2	46	3	40	2	62	3	26	3	Static hyperkyphosis	8	Total functional hyperkyphosis	7	96	1
60	Inline hockey	1	13	46.3	1.57	18.7837	3	6	2	1	2	54	3	30	2	64	3	22	3	Static hyperkyphosis	8	Static functional hyperkyphosis	5	110	2
61	Inline hockey	1	13	51.5	1.59	20.371	3	6	3	1	1	46	3	22	2	34	2	34	3	standing hyperkyphosis	4	Total functional hyperkyphosis	7	125	3
62	Inline hockey	1	14	61	1.66	22.1367	3	6	3	1	1	20	2	4	1	20	2	38	3	NORMAL	3	Structure lumbar kyphosis	1	90	1
63	Inline hockey	2	13	51.2	1.58	20.5095	3	6	2	2	1	38	2	18	1	32	2	22	3	NORMAL	3	Structure lumbar kyphosis	1	110	2
64	Inline hockey	1	15	71.45	1.668	25.6809	4	5	3	1	2	32	2	34	2	62	3	8	2	Total functional hyperkyphosis	7	NORMAL	4	110	2
65	Inline hockey	1	15	62.7	1.69	21.953	4	5	3	1	1	44	3	24	2	60	3	4	2	total hyperkyphosis	10	dynamic functional hyperkyphosis	6	103	1
66	Inline hockey	1	15	61.8	1.684	21.7924	4	5	3	1	1	32	2	30	2	24	2	30	3	dynamic functional hyperkyphosis	6	Total functional hyperkyphosis	7	102	1
67	Inline hockey	1	15	66.45	1.83	19.8423	4	6	3	1	1	26	2	30	2	28	2	28	3	NORMAL	3	Total functional hyperkyphosis	7	124	3
68	Inline hockey	1	15	77.95	1.65	28.6318	4	6	3	1	1	40	2	25	2	47	3	10	2	Total functional hyperkyphosis	7	NORMAL	4	106	1
69	Inline hockey	1	15	86.1	1.83	25.7099	4	6	1	1	1	30	2	26	2	42	3	14	2	Total functional hyperkyphosis	7	NORMAL	4	105	1
70	Inline hockey	1	15	61	1.82	18.4157	4	6	3	1	1	42	3	30	2	26	2	22	3	dynamic hyperkyphosis	9	Static functional hyperkyphosis	5	120	3
71	Inline hockey	1	15	58.8	1.72	19.8756	4	6	2	1	1	16	1	22	2	26	2	20	3	standing hypokyphotic attitude	1	Total functional hyperkyphosis	7	96	1
72	Inline hockey	1	15	85.5	1.77	27.291	4	6	2	1	1	40	2	36	2	54	3	16	3	Total functional hyperkyphosis	7	Static functional hyperkyphosis	5	86	1
73	Inline hockey	1	15	52	1.64	19.3337	4	6	3	1	1	54	3	40	2	73	3	14	2	total hyperkyphosis	10	NORMAL	4	128	3
74	Inline hockey	1	15	72.4	1.75	23.6408	4	6	2	1	1	44	3	14	1	48	3	14	2	Static hyperkyphosis	8	hypolordotic attitude	3	90	1
